# Supplementary material for: Morin Hydrate Encapsulation and Release from Mesoporous Silica Nanoparticles for Melanoma Therapy
Source: MDPI journal article supplement (doi:10.3390/molecules28124776), 2023-06-15
Supplement: s1 [file s1]

# Morin Hydrate Encapsulation and Release from Mesoporous Silica Nanoparticles for Melanoma Therapy

Catarina Cunha <sup>1,2,†</sup>, Diogo Marinheiro <sup>2,†</sup>, Bárbara J. M. L. Ferreira <sup>2</sup>, Helena Oliveira <sup>1,\*</sup>  
and Ana L. Daniel-da-Silva <sup>2,\*</sup>

<sup>1</sup> Department of Biology, CESAM-Centre for Environmental and Marine Studies, University of Aveiro, 3810-193 Aveiro, Portugal; catarinafilipacunha@ua.pt

<sup>2</sup> Department of Chemistry, CICECO-Aveiro Institute of Materials, University of Aveiro, 3810-193 Aveiro, Portugal; diogomarinheiro@ua.pt (D.M.); barbaraferreira@ua.pt (B.J.M.L.F.)

\* Correspondence: holiveira@ua.pt (H.O.); ana.luisa@ua.pt (A.L.D.-d.-S.)

† These authors contributed equally to this work.

|                                                             | Page |
|-------------------------------------------------------------|------|
| A. Calibration curves for morin hydrate quantification..... | 2    |
| B. Characterization of the MSN, MH and MH-MSN.....          | 3    |
| C. <i>In vitro</i> release tests.....                       | 5    |
| D. <i>In vitro</i> cell studies.....                        | 9    |

### A. Calibration curves for morin hydrate quantification

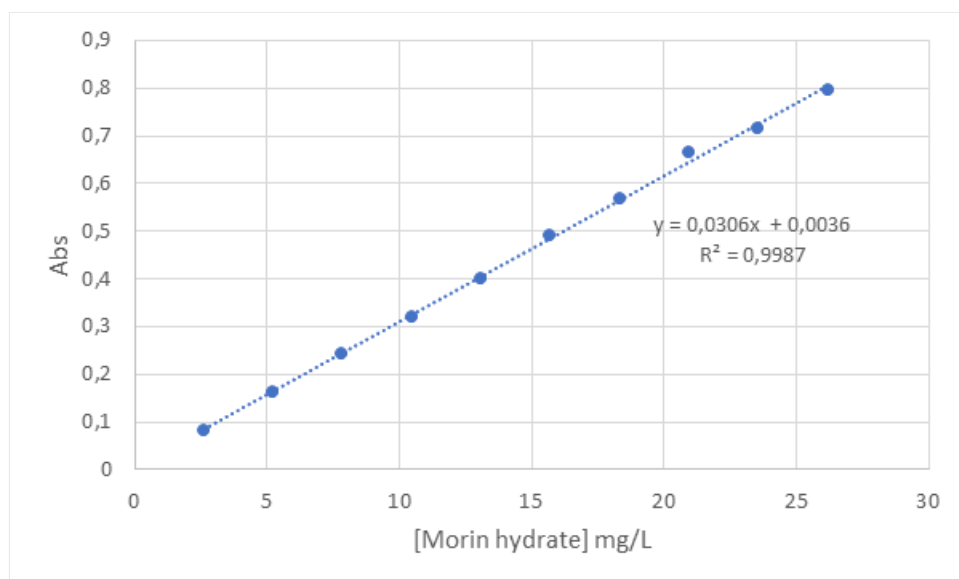

**Figure S1.** Calibration curve for morin quantification in PBS pH 7.4.

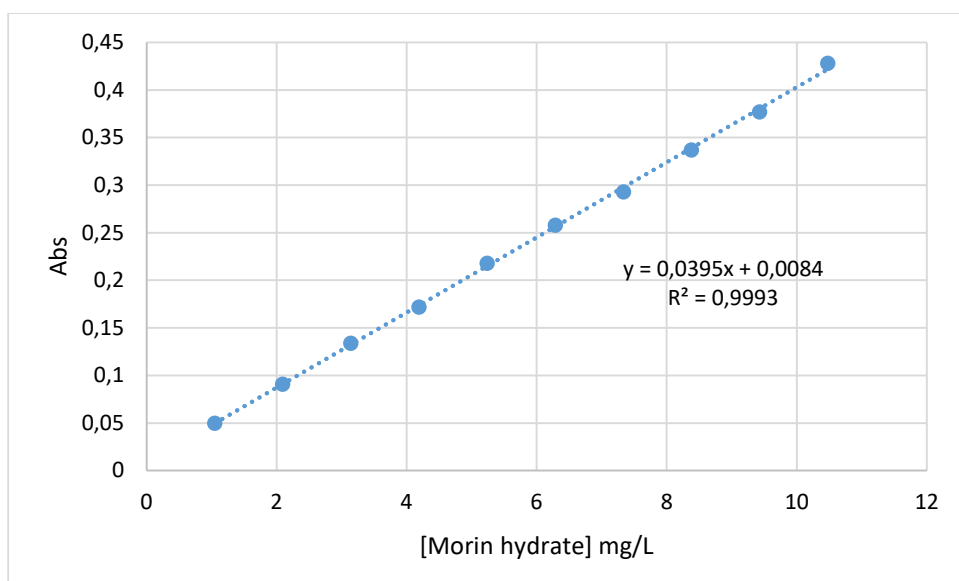

**Figure S2.** Calibration curve for morin quantification in PBS pH 5.2.

## B. Characterization of the MSN, MH and MH-MSN

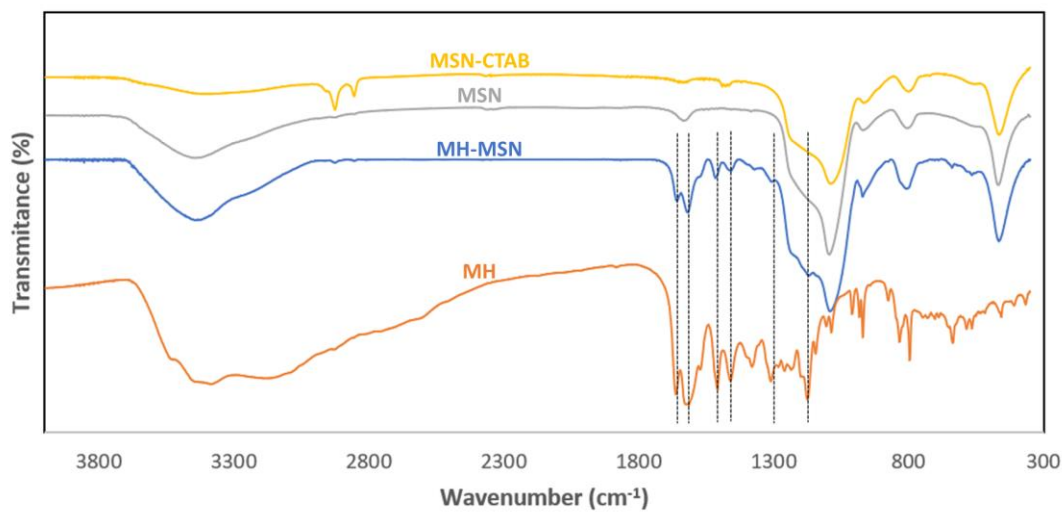

**Figure S3.** FTIR spectra (4000 to 350 cm<sup>-1</sup>) of MSN before template removal (MSN-CTAB), MSN, morin hydrate (MH) and loaded particles (MH-MSN).

**Table S1.** Elemental analysis of MSN, MH and loaded sample MH-MSN.

|    | MSN   | MH    | MH-MSN |
|----|-------|-------|--------|
| %C | 0.040 | 56.37 | 15.99  |
| %H | 1.424 | 4.954 | 2.183  |

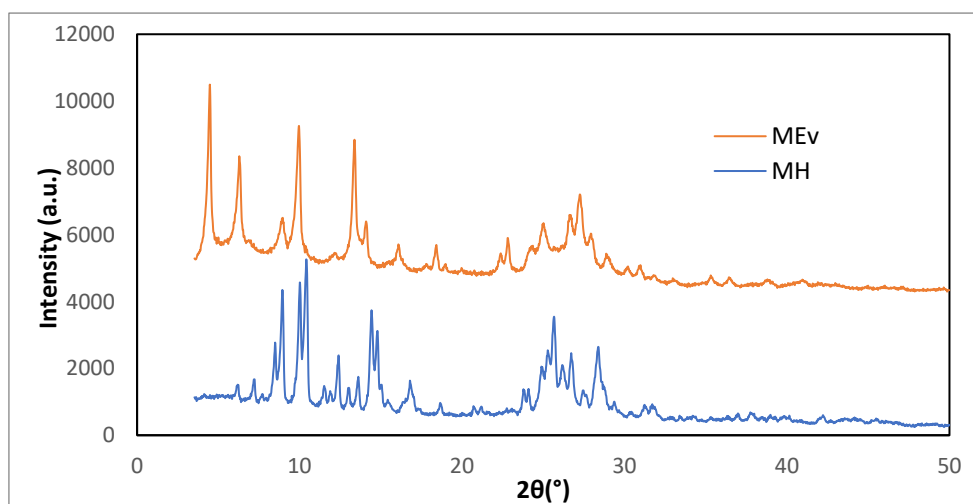

**Figure S4.** XRD spectra of commercially available morin hydrate (MH) and morin after its dissolution and removal of ethanol using a rotary evaporator (MEv).

### C. *In vitro* release tests

The cumulative release percentage of morin was calculated using Equation (S1):

$$\text{Cumulative release (\%)} = \frac{\text{Volume of aliquot withdrawn (mL)}}{\text{Total volume (mL)}} \times P_{(t-1)} + P_t \quad (\text{S1})$$

Where  $P_t$  corresponds to the percentage released at time  $t$  and  $P_{(t-1)}$  corresponds the percentage released previous to time  $t$ . The data presented in the release curves are an average of triplicates.

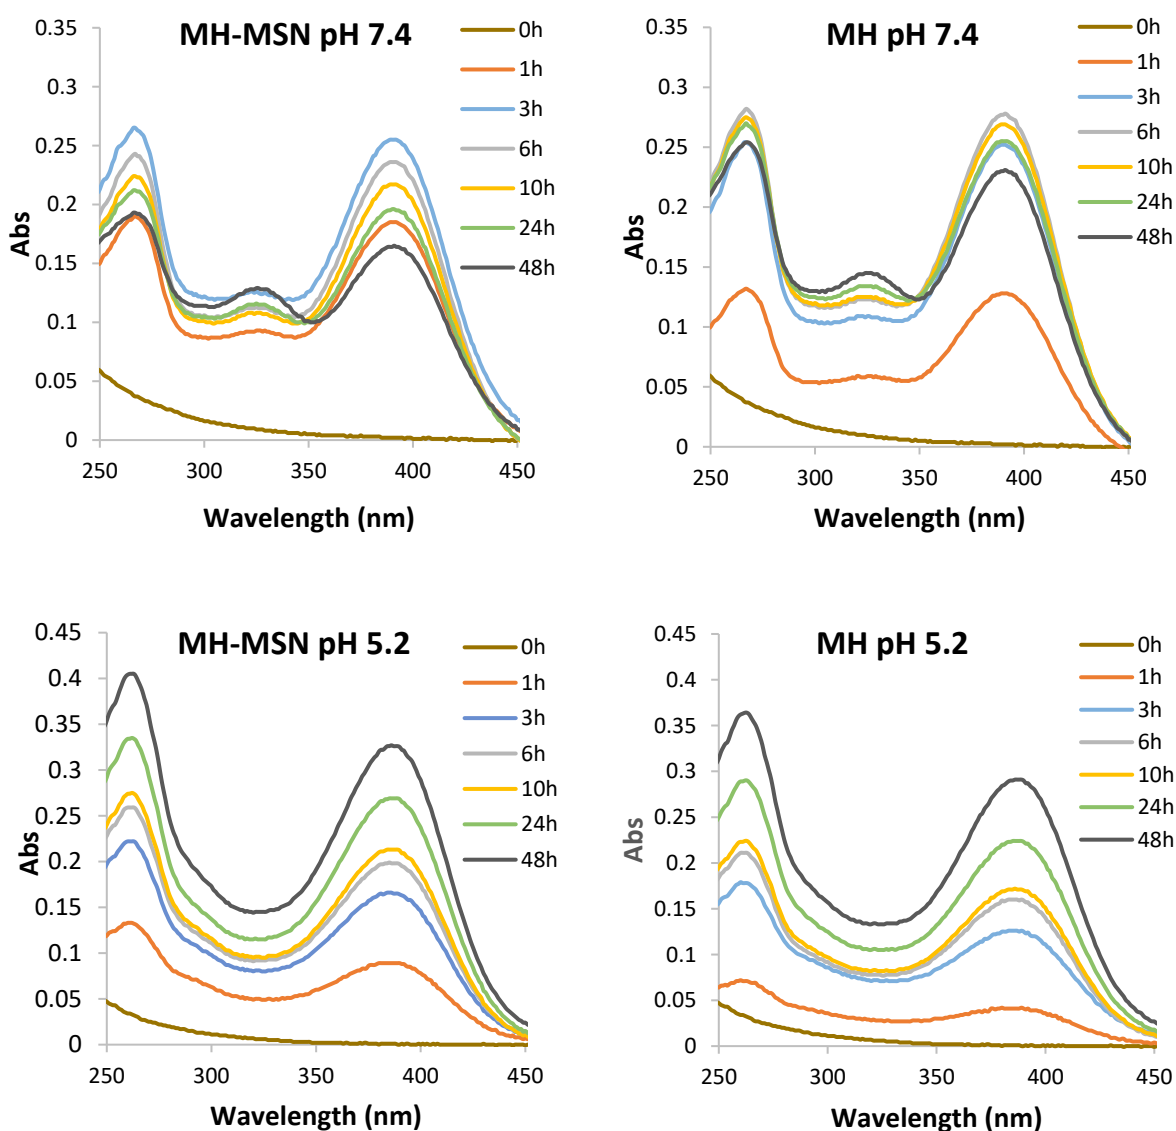

**Figure S5.** UV-VIS spectra of the release medium over time during *in vitro* release tests.

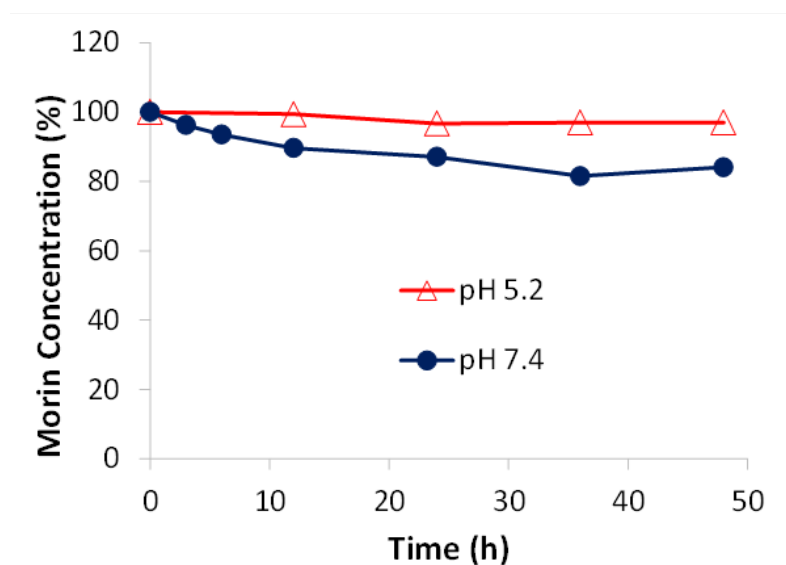

**Figure S6.** Morin concentration (%) over time in PBS 5.2 and 7.4, assessed by UV-VIS spectroscopy analysis.

**Table S2.** Non-linear equations of the Weibull model, the Korsmeyer–Peppas model (K-P), and an exponential equation based on the Noyes–Whitney equation and applying Fick’s law (NWF) and equations to evaluate the goodness of the fittings.

| Kinetic model                | Non-linear equation                                                                 | Model characteristics/parameters                                                                                                                                                                                              |
|------------------------------|-------------------------------------------------------------------------------------|-------------------------------------------------------------------------------------------------------------------------------------------------------------------------------------------------------------------------------|
| NWF                          | $M_t/M_\infty = 1 - e^{-k_F t}$                                                     | $M_t/M_\infty$ - fraction of drug released at time $t$<br>$k_F$ - first-order rate constant                                                                                                                                   |
| K-P                          | $M_t/M_\infty = k_{KP} \cdot t^n$                                                   | - Semi-empirical model<br>$M_t/M_\infty$ - fraction of drug released at time $t$<br>$k_{KP}$ - constant incorporating the characteristics of the system<br>$n$ - indicates the transport mechanism; system geometry dependent |
| Weibull                      | $M_t/M_\infty = 1 - e^{\left(-\frac{(t-T_i)^\beta}{\alpha}\right)}$                 | - Empirical Model<br>$M_t/M_\infty$ - fraction of drug released at time $t$<br>$\alpha$ - time process<br>$T_i$ - lag time before the onset of the drug release (in most cases zero)<br>$\beta$ - shape parameter             |
| Goodness of the fittings     | Equation                                                                            | Parameters                                                                                                                                                                                                                    |
| Coefficient of determination | $R^2 = 1 - \frac{\sum_{i=1}^n (y_i - \hat{y}_i)^2}{\sum_{i=1}^n (y_i - \bar{y})^2}$ |                                                                                                                                                                                                                               |
| Chi-square                   | $\chi^2 = \sum_{i=1}^n \frac{(y_i - \hat{y}_i)^2}{\hat{y}_i}$                       | $y_i$ – experimental value<br>$\hat{y}_i$ – model predicted value<br>$\bar{y}$ – mean value of the experimental data<br>$n$ – sample size                                                                                     |
| Average Relative Error       | $ARE = \frac{100}{n} \sum_{i=1}^n \left  \frac{\hat{y}_i - y_i}{y_i} \right $       |                                                                                                                                                                                                                               |

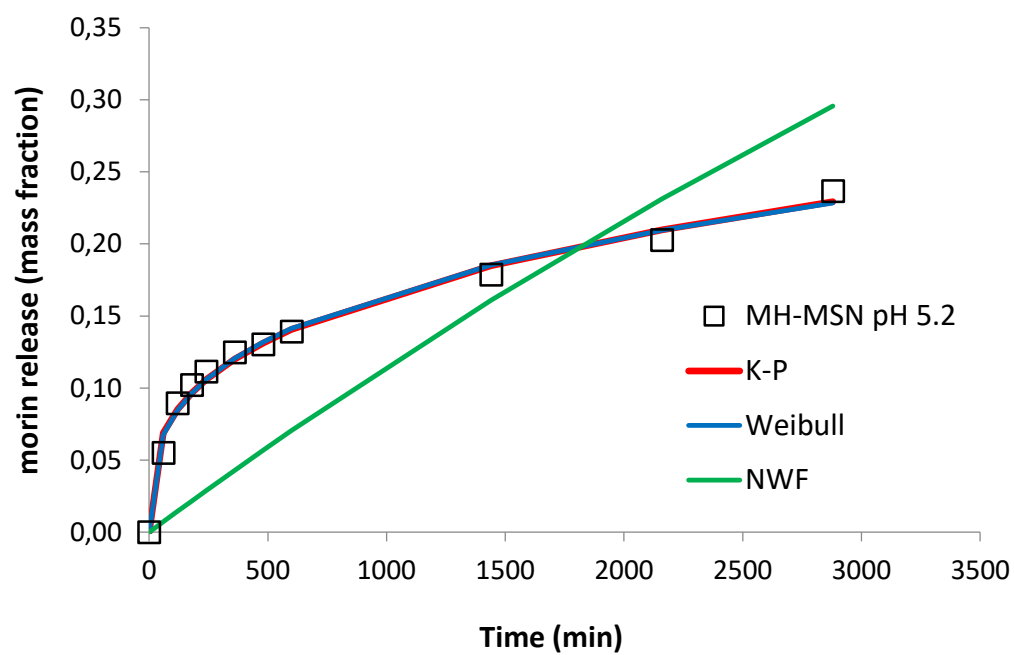

**Figure S7.** Morin release from MH-MSN at pH 5.2 and kinetic model fitting.



### D. *In vitro* cell studies

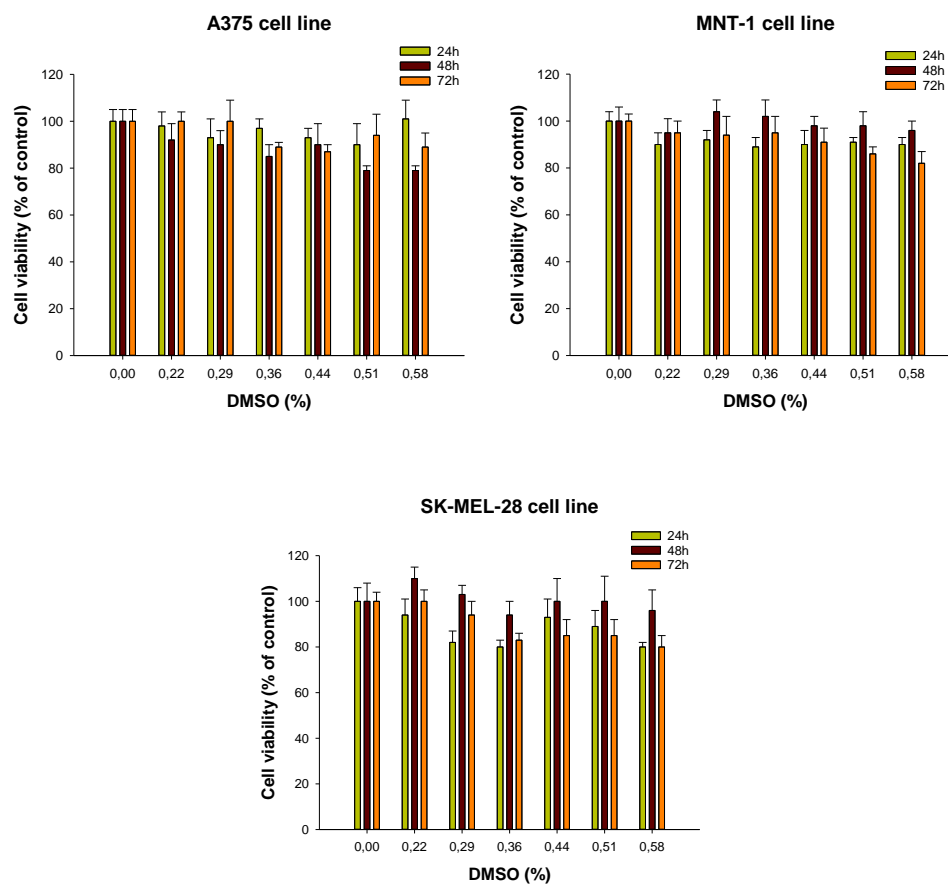

**Figure S8.** Effect of DMSO on cell viability of A375 cell line, MNT-1 cell line, and SK-MEL-28 cell lines. Cell viability was evaluated using MTT assay after 24, 48, and 72 h of exposure. Results are presented as mean  $\pm$  standard deviation (SD).

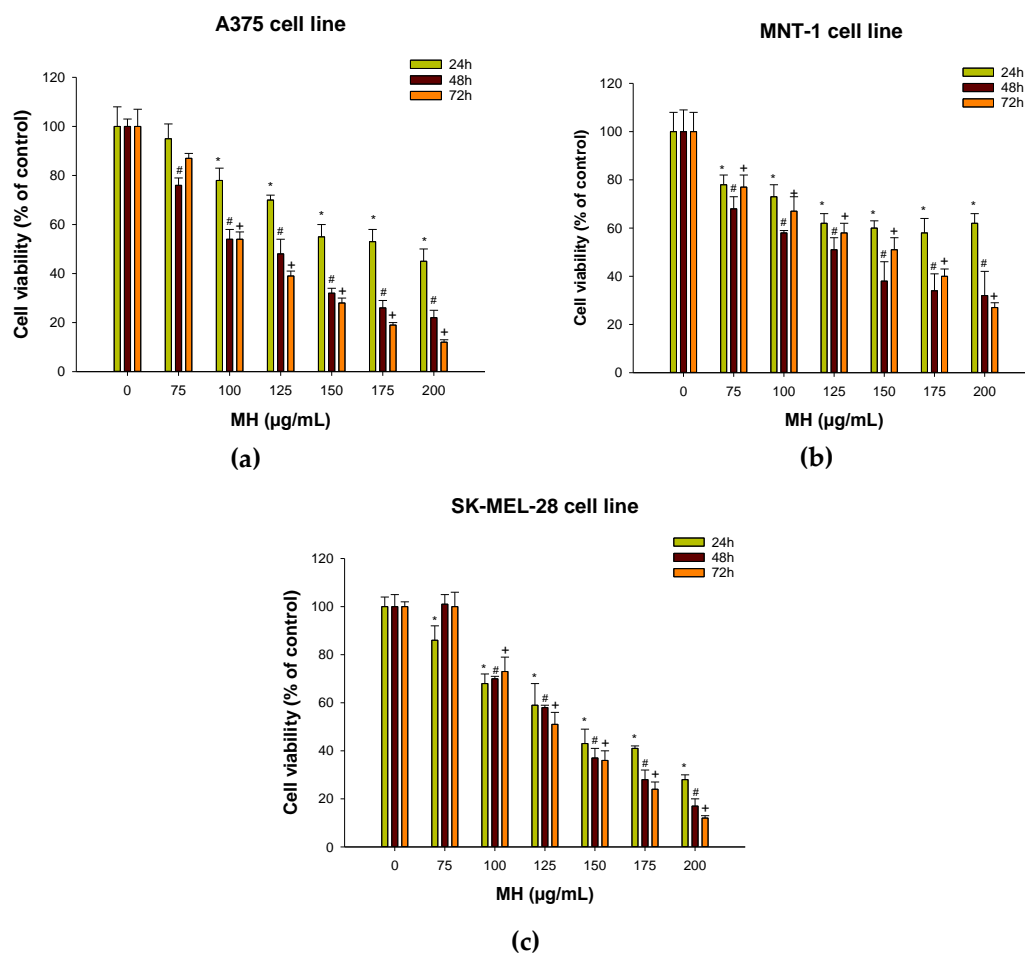

**Figure S9.** Effect of morin hydrate (MH) (0–200 μg/mL) on cell viability of (a) A375 cell line; (b) MNT-1 cell line; and (c) SK-MEL-28 cell line. Cell viability was evaluated using MTT assay after 24, 48, and 72 h of exposure, using the same density (20 000 cells/mL). Results are presented as mean ± standard deviation (SD). \*, # and + indicate significant differences between control at  $p < 0.05$  for 24 h, 48 h and 72 h, respectively.
